# Supplementary material for: Single cell analysis of Crohn’s disease patient-derived small intestinal organoids reveals disease activity-dependent modification of stem cell properties
Source: PubMed Central journal article supplement (PMC6132922; doi:10.1007/s00535-018-1437-3), 2018-01-27
Supplement: 535_2018_1437_MOESM1_ESM.pdf [file 535_2018_1437_MOESM1_ESM.pdf]

a.

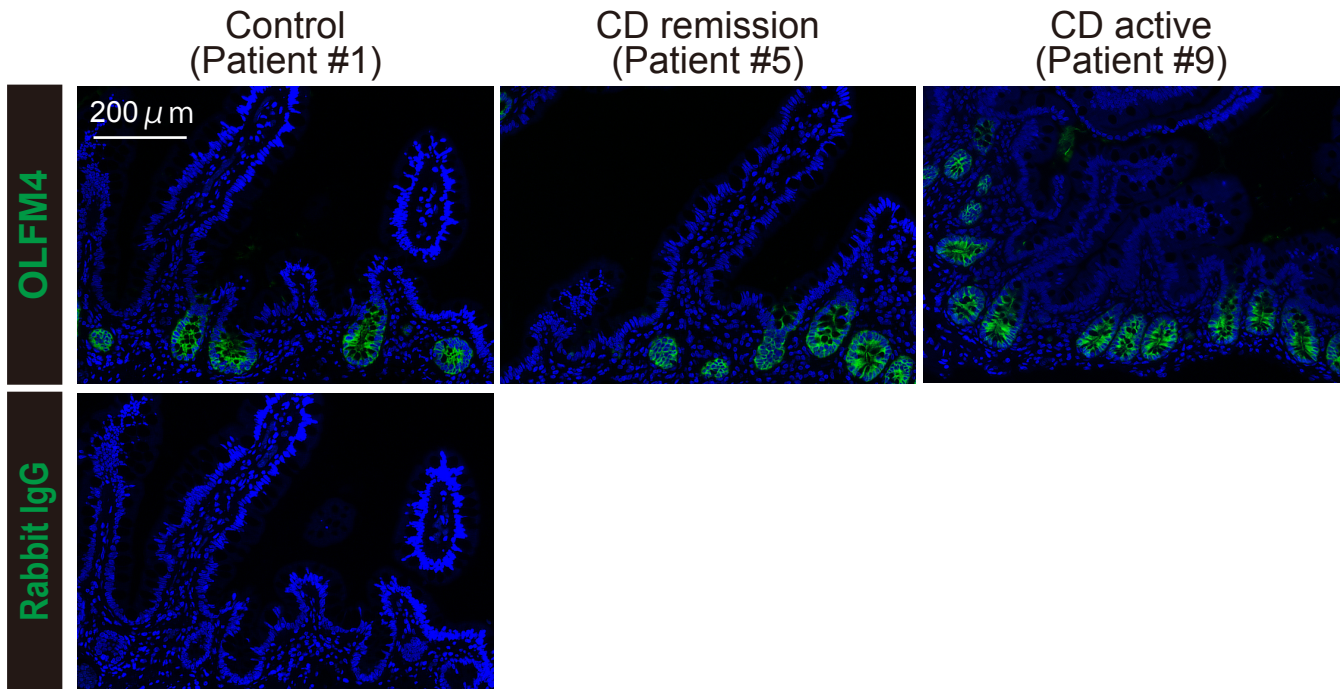

b.

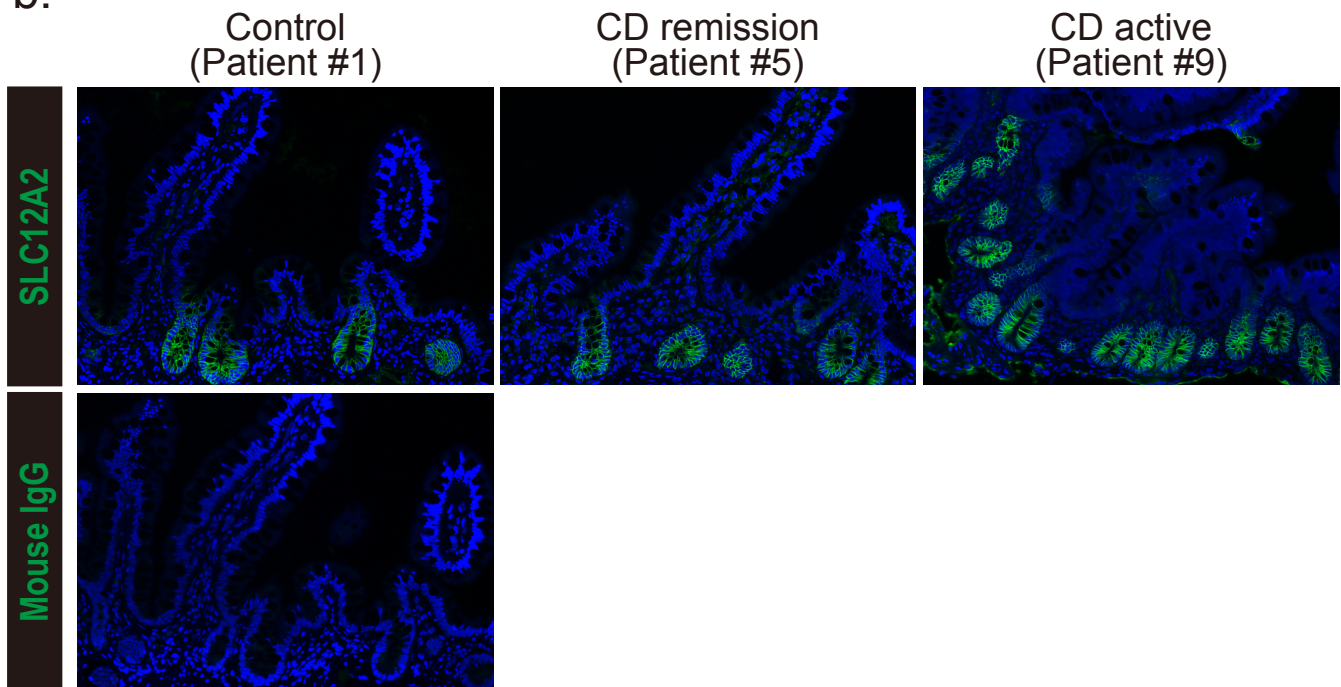

**Supplementary Figure S1. Expression of OLFM4 and SLC12A2 in biopsy specimens.**

Expression of OLFM4 (a) and SLC12A2 (b) were analyzed by immunohistochemistry using small intestinal biopsies. Positive signals are shown as green signals of the fluorescein-labeled tyramid. Results of corresponding non-immunized control IgG are also shown. Data shows results of the same area (100 cm proximal to the ileocecal valve).
