# Supplementary material for: Single cell analysis of Crohn’s disease patient-derived small intestinal organoids reveals disease activity-dependent modification of stem cell properties
Source: PubMed Central journal article supplement (PMC6132922; doi:10.1007/s00535-018-1437-3), 2018-01-27
Supplement: 535_2018_1437_MOESM3_ESM.pdf [file 535_2018_1437_MOESM3_ESM.pdf]

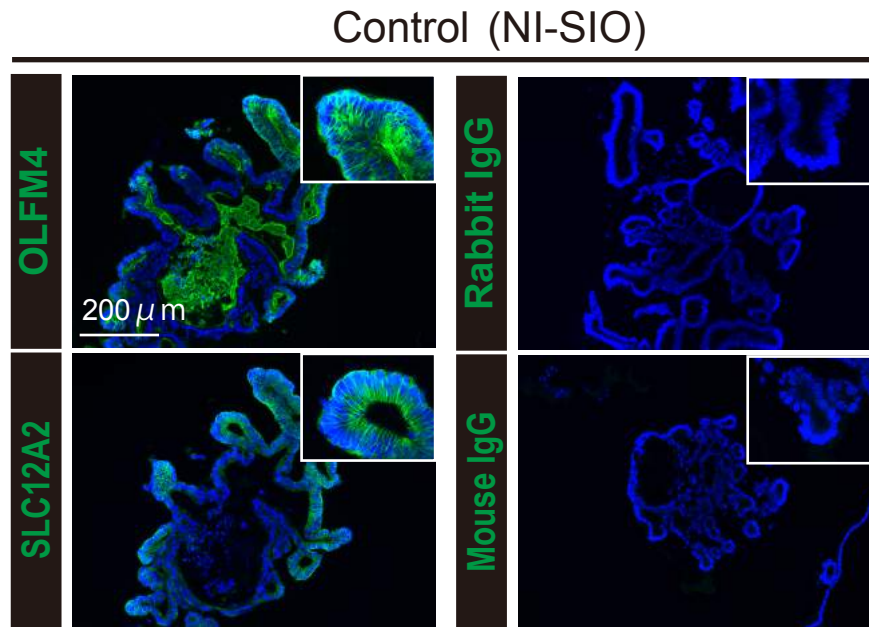

**Supplementary Figure S3. Specificity confirmation for the immunostaining of OLFM4 and SLC12A2.** Control organoids were stained by antibodies specific for OLFM4 or SLC12A2, or by their corresponding non-immunized control IgG. Positive signals are shown as green signals of the fluorescein-labeled tyramid. Note that positive signals of OLFM4 are observed in the lumens of the organoids, in addition to the epithelial cells of the budding region.
