# Supplementary material for: Single cell analysis of Crohn’s disease patient-derived small intestinal organoids reveals disease activity-dependent modification of stem cell properties
Source: PubMed Central journal article supplement (PMC6132922; doi:10.1007/s00535-018-1437-3), 2018-01-27
Supplement: 535_2018_1437_MOESM5_ESM.pdf [file 535_2018_1437_MOESM5_ESM.pdf]

a.

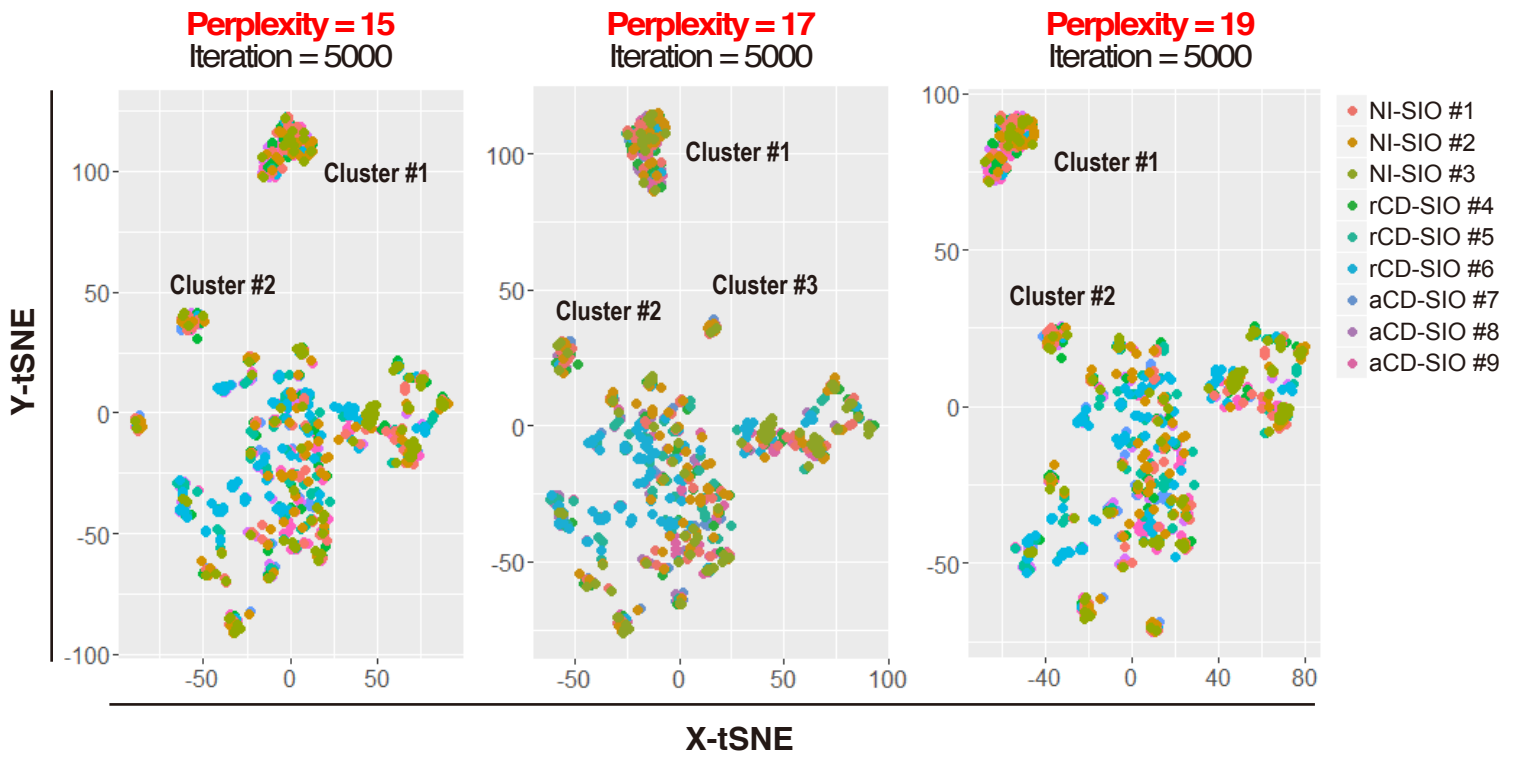

b.

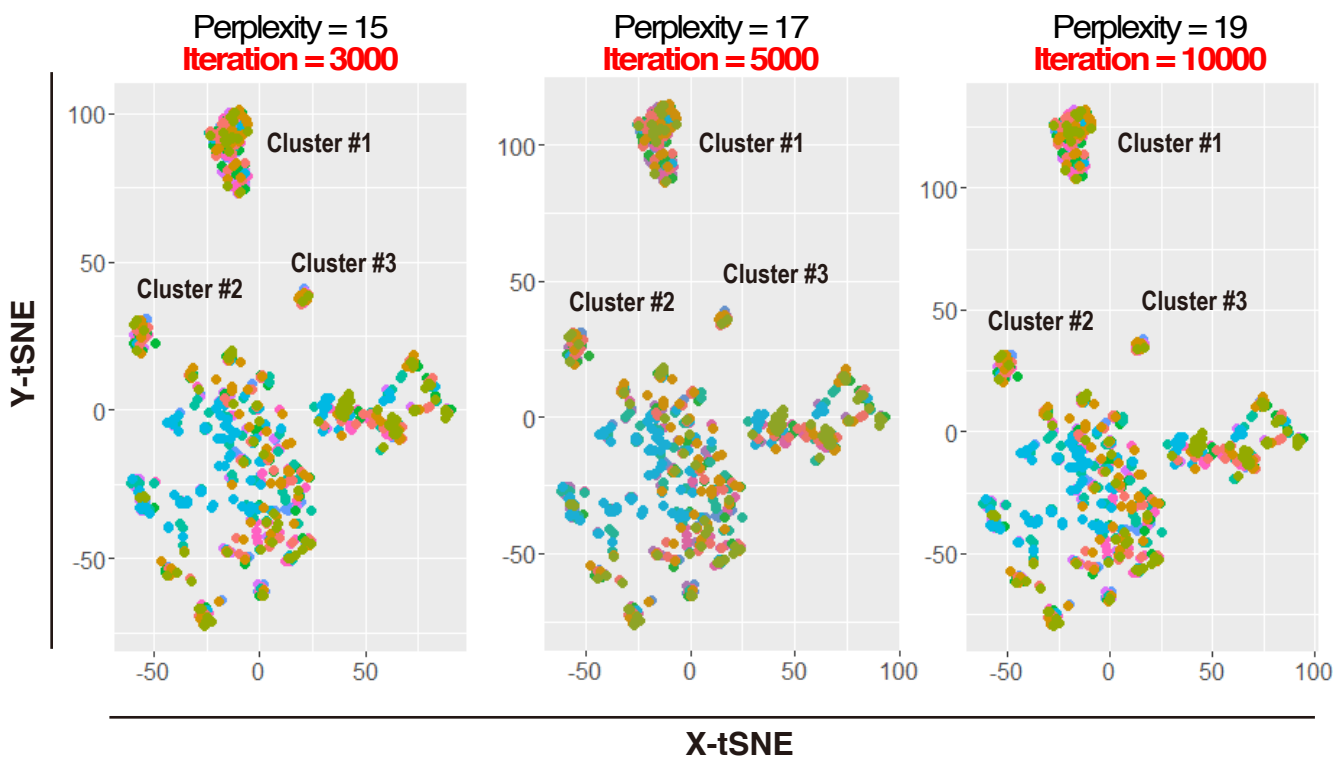

**Supplementary Figure S5. Robustness of tSNE analysis.**

tSNE analysis of dataset used in Figure 5A under different parameter conditions are shown. (a) Change in perplexity under fixed iteration number. (b) Change in iteration number under fixed perplexity.
