# Supplementary material for: Single cell analysis of Crohn’s disease patient-derived small intestinal organoids reveals disease activity-dependent modification of stem cell properties
Source: PubMed Central journal article supplement (PMC6132922; doi:10.1007/s00535-018-1437-3), 2018-01-27
Supplement: 535_2018_1437_MOESM6_ESM.pdf [file 535_2018_1437_MOESM6_ESM.pdf]

Supplementary Figure S6

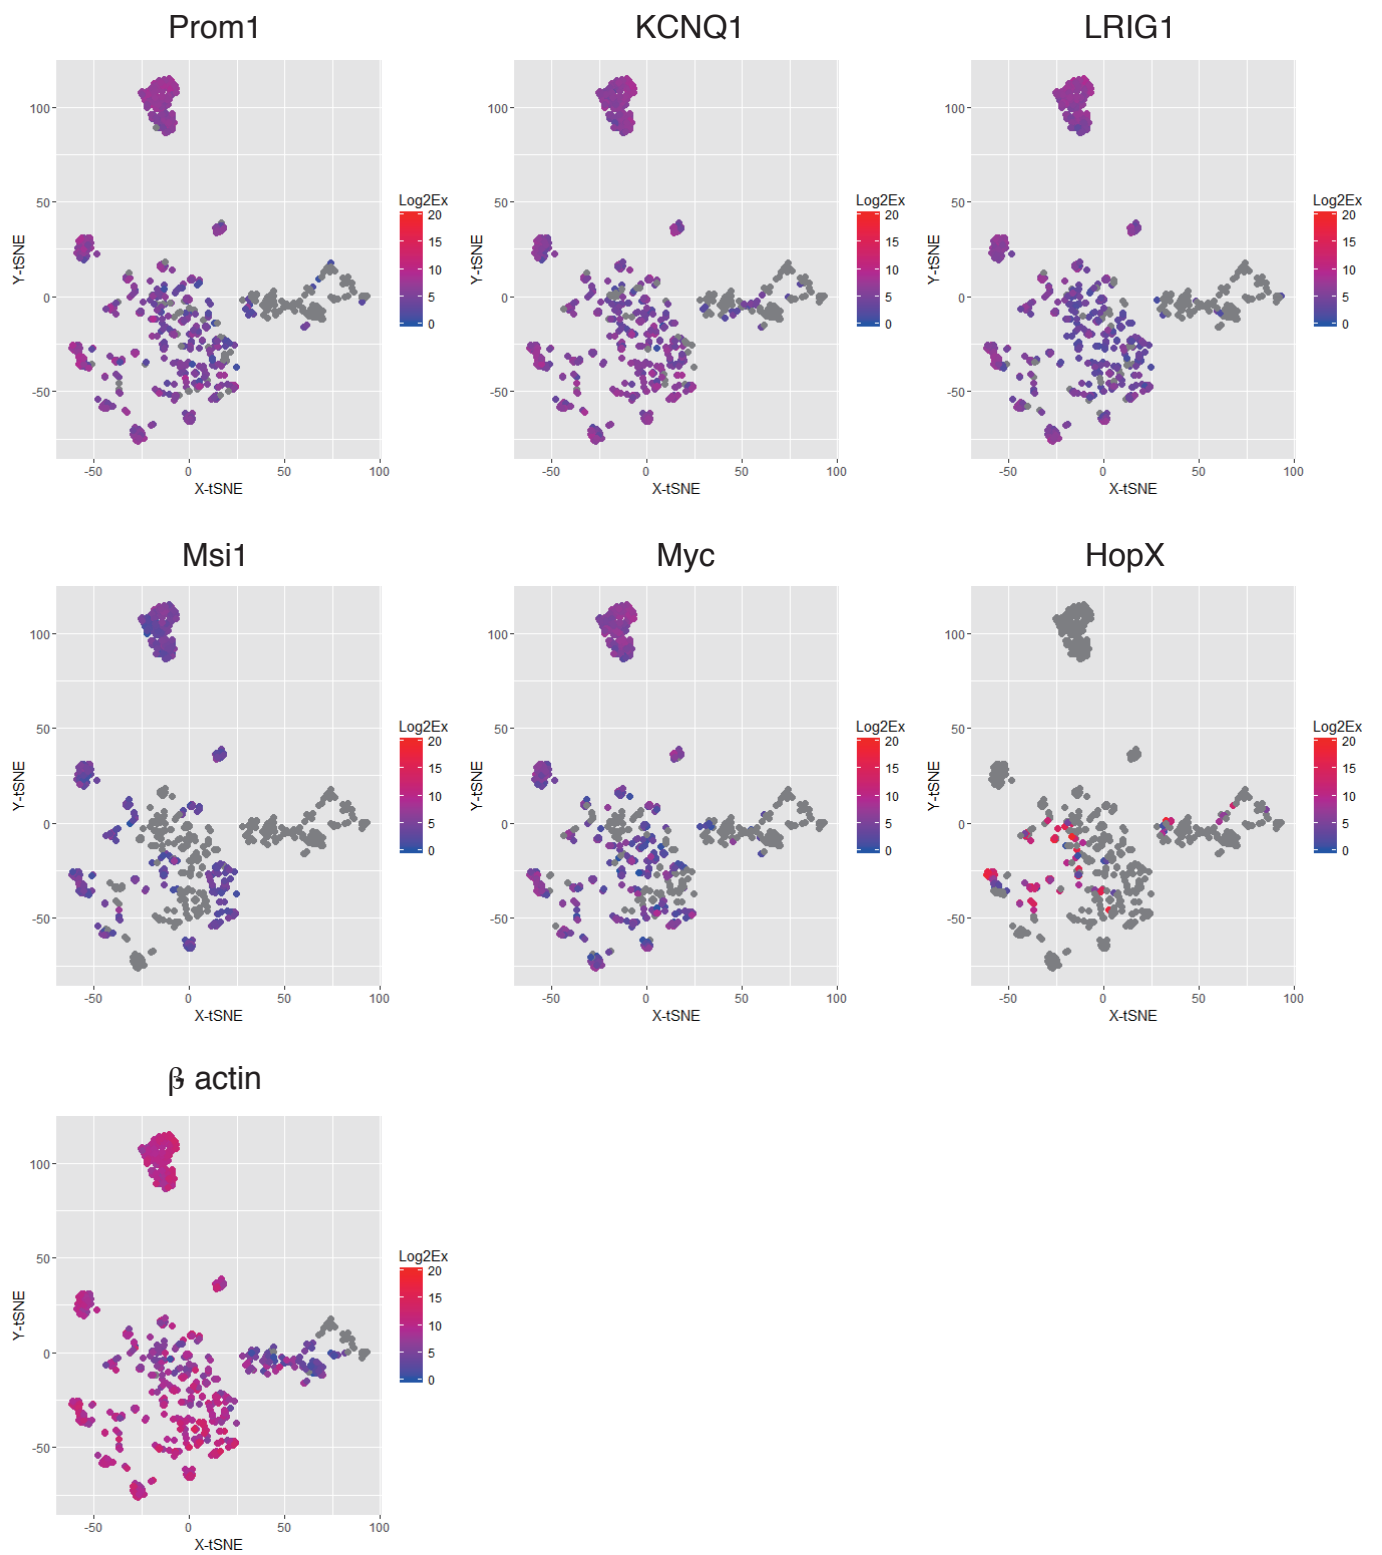

**Supplementary Figure S6. Gene expression level of individual cells in clusters identified by tSNE analysis.** Single-cell level expression of the designated genes are shown as an additional data derived from tSNE analysis shown in Figure 5.
