# Supplementary material for: Single cell analysis of Crohn’s disease patient-derived small intestinal organoids reveals disease activity-dependent modification of stem cell properties
Source: PubMed Central journal article supplement (PMC6132922; doi:10.1007/s00535-018-1437-3), 2018-01-27
Supplement: 535_2018_1437_MOESM7_ESM.pdf [file 535_2018_1437_MOESM7_ESM.pdf]

**Supplementary Table S1. Background descriptions of patients included in the study**

| ID | Organoid  | Category       | Age | Gender | Treatment                      | Sample location                                  |
|----|-----------|----------------|-----|--------|--------------------------------|--------------------------------------------------|
| #1 | NI-SIO#1  | Non-IBD        | 62  | F      | -                              | 100cm from ileocecal valve                       |
| #2 | NI-SIO#2  | Non-IBD        | 47  | F      | -                              | 100cm from ileocecal valve                       |
| #3 | NI-SIO#3  | Non-IBD        | 59  | M      | -                              | 100cm from ileocecal valve                       |
| #4 | rCD-SIO#4 | CD (remission) | 39  | M      | 5-ASA                          | 100cm from ileocecal valve                       |
| #5 | rCD-SIO#5 | CD (remission) | 33  | M      | 5-ASA + IFX<br>Elementary Diet | 100cm from ileocecal valve                       |
| #6 | rCD-SIO#6 | CD (remission) | 26  | M      | IFX+AZA                        | 100cm from ileocecal valve                       |
| #7 | aCD-SIO#7 | CD (active)    | 53  | F      | 5-ASA + ADA                    | 40cm from anastomotic site (right hemicolectomy) |
| #8 | aCD-SIO#8 | CD (active)    | 22  | M      | 5-ASA                          | 100cm from ileocecal valve                       |
| #9 | aCD-SIO#9 | CD (active)    | 54  | M      | AZA                            | 100cm from ileocecal valve                       |

**Supplementary Table S2. List of genes used for the single cell analysis.**

| <b>Gene</b> | <b>Probe set ID</b> |
|-------------|---------------------|
| GAPDH       | Hs02758991 g1       |
| ACTB        | Hs01060665 g1       |
| LGR5        | Hs00969422 m1       |
| OLFM4       | Hs00197437 m1       |
| ASCL2       | Hs00944285 s1       |
| BMI1        | Hs00995536 m1       |
| LRIG1       | Hs00394267 m1       |
| MSI1        | Hs00159291 m1       |
| HOPX        | Hs04188695 m1       |
| MYC         | Hs00153408 m1       |
| SMOC2       | Hs01591663 m1       |
| PROM1       | Hs01009250 m1       |
| SLC12A2     | Hs00169032 m1       |
| KCNQ1       | Hs00923522 m1       |
